# Supplementary material
Source: PubMed Central journal article supplement (PMC3562110)
Supplement: JB.01639-12_zjb999092432so1.pdf [file JB.01639-12_zjb999092432so1.pdf]

**Table S1. Primers used in the construction of mutants of *P. protegens* Pf-5**

| Target gene and primers | Sequence 5'-3'                                 |
|-------------------------|------------------------------------------------|
| <b>FpvZ (PFL_4092)</b>  |                                                |
| 4092UpFBam              | CACACCATCAGGATCCACAACACCGACTGACCCCTTT          |
| 4092DnFFRT-1            | AGGAACTTCAAGATCCCCAATTCGATGCCGGAGCCATCTATGA    |
| 4092UpRFRT              | TCAGAGCGCTTTTGAAGCTAATTCGATGTTCTGGTCATCCATGCGC |
| 4092DnRBam-1            | CTCTGCTTCTGGATCCTGTAGATGGTGTCTGGCCA            |
| <b>FpvW (PFL_2293)</b>  |                                                |
| 2293UpFHind             | GTGGTTGTGGAAGCTTTTCACAAGTCGAAGTTGGCC           |
| 2293DnFFRT              | AGGAACTTCAAGATCCCCAATTCGCCGACGACAGCTACTACGAAA  |
| 2293UpRFRT              | TCAGAGCGCTTTTGAAGCTAATTCGTCTCCATCACCTGGTCAATG  |
| 2293DnRHind             | GACGAAGACGAAGCTTAGTTGTCACTCTGGGCGTTGA          |
| <b>FpvX (PFL_3315)</b>  |                                                |
| 3315UpFBam              | GTTGTGCTGAGGATCCCAAACGGTGACGGTGATCA            |
| 3315DnFFRT-1            | AGGAACTTCAAGATCCCCAATTCGTGGTCTACGACCTCAACGACA  |
| 3315UpRFRT              | TCAGAGCGCTTTTGAAGCTAATTCGTGAAGTACATCGGGAAGCC   |
| 3315DnRBam-1            | GAGAAGGAGAGGATCCGAAGCCGGTGCTGAAATTG            |
| <b>FpvV (PFL_2527)</b>  |                                                |
| 2527UpFBam              | GTGTGGTAGTGGATCCTGCACCGTAGTTACCGTAGGA          |
| 2527DnFFRT              | AGGAACTTCAAGATCCCCAATTCGTTGCGGATCAGGTTGATGGT   |
| 2527UpRFRT              | TCAGAGCGCTTTTGAAGCTAATTCGTACACCAGCATCTTCAACCCC |
| 2527DnRBam              | CACACCATCAGGATCCGCGCACATTTTGCTGTCCTA           |
| <b>FpvU (PFL_2391)</b>  |                                                |
| 2391UpFBam              | CTCTGCTTCTGGATCCACAGGTTCTGGGTGATCTGGT          |
| 2391DnFFRT              | AGGAACTTCAAGATCCCCAATTCGTTCTTGCGCACCAGGTTGAT   |
| 2391UpRFRT              | TCAGAGCGCTTTTGAAGCTAATTCGAAGGACAGCAAGCTGCTCAAC |
| 2391DnRBam              | GAGAAGGAGAGGATCCAACCTGAGTACCCAGAGCGGTT         |
| <b>FpvY (PFL_3485)</b>  |                                                |
| 3485UpFBam              | GAGAAGGAGAGGATCCCGGGCTATCGGGGTAATACA           |
| 3485DnFFRT1             | AGGAACTTCAAGATCCCCAATTCGCCTACTTCGAGGTGCATGA    |
| 3485UpRFRT              | TCAGAGCGCTTTTGAAGCTAATTCGTTCGAGGATGCCGTAGTAGA  |
| 3485DnRBam              | GTGAGTTGCTGGATCCCCTTGCCGTAGTTGCTGAGTA          |
| <b>PFL_2772</b>         |                                                |
| 2772UpFHind             | CAGCACGAAGCTTCGGTTTTACCGCCAGCTTC               |
| 2772UpR                 | GCGGTGATGGCGCTCCAGCAATTCATAGGGC                |
| 2772DnF                 | TTGCTGGAGCGCCATCACGCCTTACGAACT                 |
| 2772DnRHind             | CTCCTCGAAGCTTAGGAGTACCTGGTGATACGC              |

**Table S2. Primers used to amplify *pvdD* of *P. fluorescens* A506, WCS374, and SBW25**

| <b>Target gene and primers</b>            | <b>Sequence 5'-3'</b>  |
|-------------------------------------------|------------------------|
| <b>PflA506_3090 (<i>pvdD</i> of A506)</b> |                        |
| PflA506_3090 F                            | AGTACCTGTTCAACGGCTATG  |
| PflA506_3090 M1                           | TGCCGACGCATTTGATGTTC   |
| PflA506_3090 M2                           | CGAAGACGACCATGTGTTG    |
| PflA506_3090 R                            | CCAGAAGTGCTACCACCATTTC |
| <b>PFLU_2544 (<i>pvdD</i> of SBW25)</b>   |                        |
| PFLU_2544 F1                              | CTACCTGTTCAACGGCTAC    |
| PFLU_2544 R1                              | CAACTGCTCCTTGATCTGCT   |
| PFLU_2544 F2                              | CTCAAGCAGATCAAGGAGCA   |
| PFLU_2544 R2                              | GCCAACGACCATTTCAATCG   |

**Table S3.** Growth of Fpv<sup>-</sup> mutants of Pf-5 on an iron-limited medium in the presence of crossfeeding strains of *Pseudomonas* spp.

| Crossfeeding Strain              | Growth of Pf-5 Deletion Mutant <sup>a</sup> |             |             |             |             |             |
|----------------------------------|---------------------------------------------|-------------|-------------|-------------|-------------|-------------|
|                                  | <i>fpvZ</i>                                 | <i>fpvU</i> | <i>fpvY</i> | <i>fpvW</i> | <i>fpvX</i> | <i>fpvV</i> |
| <i>P. protegens</i> Pf-5         | -                                           | +           | +           | +           | +           | +           |
| <i>P. aeruginosa</i> PAO1        | +                                           | -           | +           | +           | +           | +           |
| <i>P. fluorescens</i> SBW25      | +                                           | -           | +           | +           | +           | +           |
| <i>P. fluorescens</i> ATCC 13525 | +                                           | -           | +           | +           | +           | +           |
| <i>P. chlororaphis</i> ATCC 9446 | +                                           | -           | +           | +           | +           | +           |
| <i>P. rhodesiae</i> CFML 92-104  | +                                           | +           | -           | +           | +           | +           |
| <i>P. fluorescens</i> B10        | +                                           | +           | +           | -           | +           | +           |
| <i>P. putida</i> CS111           | +                                           | +           | +           | +           | -           | +           |
| <i>P. putida</i> BN7             | +                                           | +           | +           | +           | +           | -           |
| <i>P. fluorescens</i> A506       | +                                           | +           | +           | +           | +           | +           |
| <i>P. fluorescens</i> WCS374     | +                                           | +           | +           | +           | +           | +           |
| <i>P. aeruginosa</i> LESB58      | +                                           | +           | +           | +           | +           | +           |

<sup>a</sup> Growth of Fpv<sup>-</sup> mutants in a  $\Delta pvdI$ -*pchA* background of Pf-5 on an iron-limited medium (KMB amended with 600  $\mu$ M 2,2'-dipyridyl) in the presence of the crossfeeding strain: +, growth; -, no growth. The  $\Delta pvdI$ -*pchA* mutant of Pf-5 did not grow on the iron-limited medium in isolation, but did grow in the presence of all crossfeeding strains listed.

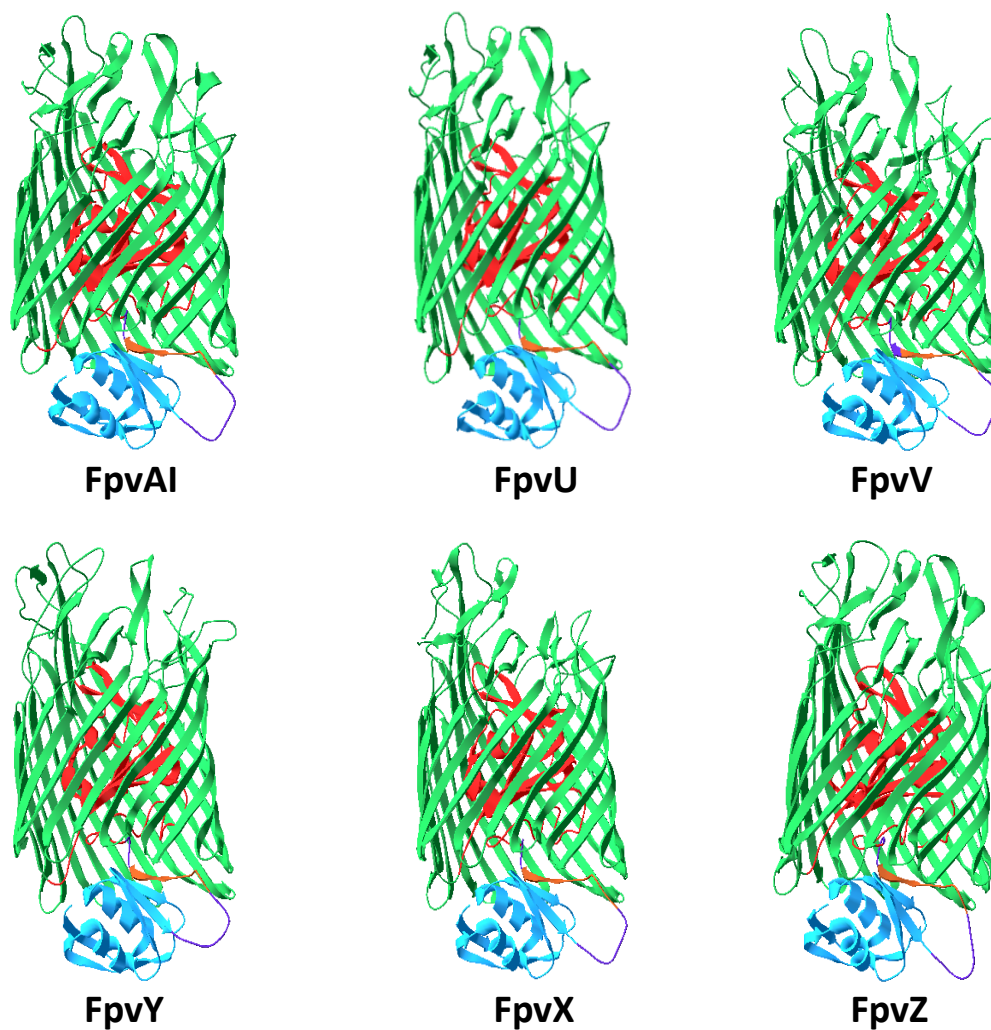

**Fig. S1. Homology models of FpvAI of *P. aeruginosa* PAO1 and five proteins (FpvU, FpvY, FpvZ; FpvV; FpvX) of *P. protegens* Pf-5.** Structural components of Fpvs, with the  $\beta$ -barrel in green, plug in red, N-terminal signaling domain in blue, connecting loop in purple, and TonB box in brown. The homology models were constructed using a structure-based sequence alignment with the crystal structure of FpvAI from *P. aeruginosa* PAO1 (3) as a template. Locus tags corresponding to Fpvs of Pf-5 are FpvU (PFL\_2391), FpvV (PFL\_2527), FpvW (PFL\_2293), FpvX (PFL\_3315), FpvY (PFL\_3485), and FpvZ (PFL\_4092).

PA2398 -----MPAPHQ **E** -- **P**LSKAFLMRRAFQ-RRILPH**S**LA**M**A**T**--SLPL**A**GYV**A**Q**E**VE**F**  
PFL\_2391 MQIIPISYGTSM**H** **P**--**T**TPARSILALAI-CLACNPV**M**AE**P**--TTATD-NQATATYS**S**  
PFL\_3485 -----MHIR**T**--**P**PA-ATLRPVIIG-**I**SVASTSLPL**A**--AETG**A**AVTDHQQR**D**  
PFL\_4092 -----MPAQR**R** **T**--**P**LTKA-LRQA**F**S-PKLA**S**RTL**C**LA**T**--TLPL**M**AQV**A**Q**E**IE**H**  
PFL\_2527 MSSAVTQRR--**H**RT**F**--**S**LKQNLGAVAQ**G**-**I**VCLG**A**ST**A**T**A**L--LPT**W**ALAAEQ**A**Q**V**E**F**  
PFL\_3315 ---MPSPRRSRLPFHT**L** **C**T**A**-----**L**CGAAP**W**A**H**A--ADAG**Q**NS**T**A**E**RR**S**  
PFL\_2293 M-----**S**--**D**YHKS**K**L**A**QA**I**K**V**C**L**WG**A**LAV**Y**GA**L**LPLT**A**V**A**S**E**C**T**AV**R**R

PA2398 **D**LP**Q**AL**G**S**L**Q**E****F****C**R**O**A**D****N**Q**V**L**R**P**E**V**R**N**K**R**S****A****I****K**G**L**E**P**N**Q****A****T**E**L**L**R**C**T**G**A**S**V**D**F**  
PFL\_2391 **A**LR**Q**S**L**A**N**L**D**Q**L**S**T****Q**S**I****C**I**A****S****M**A**J**A**Q**C**I**E**S****A****I**S**C**R**M****A**E**Q**A**I****S**K**L**L**A**C**T**G**I**G**F**E**R**  
PFL\_3485 **A**I**A**P**C**N**L**D**Q**V**L**G**I****F****Q****S****S**M**A**I**D****N**L**S**A**G**K**R**S**T****C**P**N**G**R****F****S**V**A**E**G****O**R**L**K**P**I**G**L**O**A**V**A  
PFL\_4092 **N**I**V**Q**S****S****G**A**L**Q**E****F****C**R**O**A**N**Q**V**L**R**P**D**D**V**Q**K**R**S****N****F**S**G**S**T****P**E**R**A**T**A**A**L**N**G**T****V**A**I**T**L**  
PFL\_2527 **D**I**A**P**C**N**L**A**S**A**L**T**R****F**Q**S**A**H**L**L**S**I****P****S**L**T**E**C****S**S**P****P****R**G**R**H**D****V**D**S**C**I****A**L**L**S**T**G**L**O**A**V**R**  
PFL\_3315 **S**I**C****P**P**L**V**T**V**L**N**R****A**E**C**S**A****F**I**A**G**H**N**D**L**A**A**G**C**Q**S**P****I****N**G**R****F**S**V**A**E**A**L**Q**L**L**A**N**G**L**O**A**Q**A  
PFL\_2293 **D**I**A****G**D**L**E**V**L**S**R**A**S**A**A**I**S**F****D****R**Q**T**A**C****F**S**A**G**I****K**E**I**C**V**Q**E****C****F**A**R**L**L**A**G****C**W**Q**A**E****P**

PA2398 **Q****N**-**A**I**T****S**V**A**E**A****D**S**S**V**L**G**A**T**M****I****S**N**Q**L**G****T**E**D**G**S**S**Y**T**P****C**I**A**T**A**T**R**L**V**L**P**R**E**T**P**Q  
PFL\_2391 **N**C**A**N**A**V**L****T**R**L**P**Q**S**S**Q**A**V**E**A**T****Q****V**S**N**Q**L**G**T**E**S**G**S**S**Y**T**P****C**I**A**T**A**T**R**N**V**L**P**R**Q**T**P**Q  
PFL\_3485 **E**A**G**-**Y**R**I**Q-**A**S**G**E**R**V**L**C**A**T**T****V**T**N**Q**L**G**T**E**S**S**Y**T**P****C**I**A**T**A**T**R**L**V**L**P**R**E**T**P**Q  
PFL\_4092 **K**D-**N**S**V**T**E**-**R**N**H**C**G**N**G**S**L**E**L**G**T****T****T**S**C**Q**G**L**G**A**T**T**E**D**T****G**S**Y**T**C**A**M**Q**T**A**S**K**L**S**L**T**R**E**T**P**Q**  
PFL\_2527 **G**N**G**-**D**Y**S**L**Q**T**R****N**G**A**S**L**E**P**V**S****S**C**K**A**F**C**S**T**T**E**G****C**E**Y**T**T****E**S**S****S**T**R**L**N**L**P**R**E**T**P**Q  
PFL\_3315 **V**S**G**-**G**Y**V****K**V**L**P**A****T**S**C**P**L**Q**L**G**T****T**Q**S**A**Q**G**L**G**S**V**T**E**S**S**Y**T**C**A**S**A**T**G**L**N**S**L**R**E**T**P**Q**  
PFL\_2293 **Q**S**N**G**S**F**V****R**P**V**Q**S****G**A**L**L**L**G**T**T**Q****Q**C**O**E**L**G**A**T**T**E**V**G**S**S**Y**T**C**A**V**-**I**G**I**G**Q**H**L**E**T**P**Q**

\* \* \* \*

PA2398 **S**I**T**V**T**R**C**N**D**D**F****G**L**N**N**I**D**D**V**M**R**H**T**P**G**I**T**V****S**A--**Y**D**T****R**N**N****Y****A**R**G**F**S****I**N**N**-**F**O**Y**D**G****L****S**  
PFL\_2391 **S**I**T**V**T**R**C**N**D**D**F****G**L**N**N**V**D**D**V**M**R**H**T**P**G**I**T**V****S**A--**Y**D**T****R**N**N****Y****A**R**G**F**S****I**N**N**-**F**O**Y**D**G****L****S**  
PFL\_3485 **S**I**V**V**T**R**C**N**D**D**F****G**L**N**S**I**D**V**M**R**H**T**P**G**I**T**V**A**T--**Y**D**S**L**T**S**Y**S**R**G**F**A**I**N**N**-**F**O**Y**D**G****L****S**  
PFL\_4092 **G****V**V**T**R**C**N**D**D**C**N**R**S**L**D**V**L**A**T**P**G**I**S**I****K**-**D**G**P**Q**R**P**T****Y**S**R**G**F**A**E**N**L**M**T**D**G****L****N**  
PFL\_2527 **S**I**T**V**T**R**C**N**D**D**C**N**S**I**L**T**D**T**O**L**E**A**T**P**G**I**V****R**D**G**L**G**A**T**D**S****F**E**R**G**A**M**N**-**E**I**D**G**V****T**  
PFL\_3315 **S**I**V**V**T**R**C**N**D**D**C**A**T**S**I**A**D**T**L**R**R**A**P**G**V**S**V**Q**N**--**Y**D**S**E**R**W**E****S**S**R**G**L**D**I**T**N**-**F**O**Y**D**G****L****S**  
PFL\_2293 **S**I**V**V**T**R**K**M**D**D**C**N**L**N**I**D**O**V**M**E**K**T**P**G**I**T**Y**D--**S**P**M**G**G**K**Y****Y**S**R**G**F**R**M**T**G**Q**Y**D**G****V**L

\*\* \*\*

PA2398 **T**A**R**N**V**G**Y**S**A**G**N**T**L****D**M**A**I**D**R**V**E**V**L**G**A**T**G**L**L**T**G**A**G**S**L**C**A**T**I**N**L**R**K**R****P**T**H**E**K****H**V**E****G**  
PFL\_2391 **T****R**N**V**A**Y**S**A**G**N**T**L****D**M**A**I**D**R**V**E**V**L**G**A**T**G**L**L**T**G**A**G**S**L**C**A**T**I**N**L**V**R**K****P**T**A**Q**Q****H**A**S****I****G**  
PFL\_3485 -**Q**D**A**Q**Y**S**S**G**H**T**L****D**T**V**I**D**R**V**E**L**G**A**T**G**L**L**T**G**A**G**C**F****C**T**I**N**V**R**K****P**T**A**E**A**G**H**I**D****G**  
PFL\_4092 **D****E****T**H**L**S**R**D**M**S**E****D**M**A**I**D**H**E**V**E****V****G**A**T**G**N**Q**G**A**G****F**S**A**A**K****V**R**K**R**P**T**A**T**P**V**T****V****G**S  
PFL\_2527 **N**T**R**L**D**---**N**Y**S**Q**S**A**M****D**R**V**E**V****G**A**T**G**L****S**G**M**G**F**S**A**T**I**N**L**R**K**R**P**T**S**A**Q****S**I**T**G**Q**  
PFL\_3315 **Y**D**G**V-**Y**D**Y**G**T**I**S****D**M**A**T**D**R**V**E**I****G**A**I**G**L****S**G**S**D**F**S**A**T**N**L**R**K**R**P**T**K**E****F**A**S**V**T**G**T**  
PFL\_2293 **D**M**G**S**S**Y**V**Q**A**D**S**F**S****D**M**A**F**Y**D**R**V**E**I**Y****G**A**A**G**L**K**G**A**G**T**A**G**S****V****F**V**R**K**G**Q**A**T**P**H**E**L**T****M**S

PA2398 **A**G**S**W**D**N**Y**R**S**E**D**V**S**G**P**L**T**E**S****G**N**V**R**G**R**A**V**A**Y**Q**D**K**H**S****F****D**H**E****K**T**S**V**Y**G**I**L**E**F**D**L**N**P**D**T  
PFL\_2391 **M**G**S**W**D**N**Y**R**S**E**D**V**S**G**P**L**T****E****S****G**N**V**R**G**R**A**V**A**Y**Q**D**K**Q**S****F****D**H**V**S**K**T**S**V**Y**G**I**L**E**F**D**L**S**P**D**T  
PFL\_3485 **A**G**S**W**D**N**Y**R**S**Q**D**V**S**G**P**L**T****E****S****G**N**V**R**G**R**M**V**A**Y**Q**D**K****K**S**L**D**H**T**Q****Q**T**S**V**Y**G**I**L**E**F**D**L**S**P**D**T  
PFL\_4092 **A**G**S**W**D**D**Y****E****E****D**A**S**N**A**L**N**K**S**G**T****R**G**R**V**V**A**A**Y**C**S**K**G**R****O**D**F**V**S**S**E**R**N****W****Y**G**I**T**A**D**L**N**E****T**  
PFL\_2527 **A**G**S**W**D**R**Y**G**G**G**D**V**S**G**P**L**T****E****S****G**N**V**R**G**R**L**V**A**D**Y**K**T**E**S**A**V****D**R**K**Q**Q**T**Q****D**Y**G**I**L**E**F**D**L**S**E****T**  
PFL\_3315 **A**G**S**W**D**N**Y**R**S**E**G**D**S**G**P**L**T**E**S****G**N**R**G**R**F**V****V**Q**D**S**Y**L**D**H**Y**Q**N**T**K**D**A**Y**G**I**L**E**F**D**L**S**P**D  
PFL\_2293 **A**G**S**W**D**N**Y**R**Q****V**D**T**C**P**L**N****A**G**T**V**R**G**R**A**V**V**T**Q**T**R**Q****Y****Y**D**L**G**E****K**D**Q****V**Y**G**A**L****S****D**L**S**D**A**T

\*

\*

PA2398 **L**T**V****G****A**D**Y**Q**D**N**D**P**C**S**G****S****G**S**F**L**I**D**S**Q**G**N**R**N**D****V**R**S****F****N**N**C**A**K**W**S****S****O**Y**T**R**V**F**A**N**L**H  
PFL\_2391 **L**T**V****G****A**D**Y**Q**D**N**I**P**C**S**S****G****T**F**L**I**N**A**T**G**H**N**S****M**R**S****N**C**A**T**W**S**G****O**Y**T**R**A**F**A**M**L**H  
PFL\_3485 **L**T**V****G****A**D**Y**Q**D**N**D**P**C**S**S****G****S**S**L****D**S**K**G**N**A**I**S**T**R**S****N**C**A**S**W**S**R****O**Y**T**R**A**F**T**L**H**  
PFL\_4092 **T**F**F**C**A**S**N**O**S**G**R**-**N**N**T**S**W**C**G**-**L**P**V**-**A**A**D**G**S**D**L**H**K**R**S**T**Y**L**E****S**K**W**E**Y****D****O**N**N**T**A**F**S**R**L****Y**  
PFL\_2527 **L**L**T****G**L**S****Y****O**R**T**D**V**D**S**P**L**R**G**-**L**P**T**R**F****S**G**E**R**T**D**F**K**R**S**T****N**T**S**P**D****W**S**Y**N**H**Q**Q****T****Y**F**A**S**L****Q**  
PFL\_3315 **L**L**T****F**G**L**D**Q****C****O**N**T**R**S****G**A**T****G**-**F**P**X****F**S**D**G**S**R**T**R**F****S****S****N**P**A****T**D**W**S**R**R**F**K**N**O**L**F**T**S**L****Q**  
PFL\_2293 **T****G**L**G**M**A****E**D**V**D**S**-**P**C**W**C**G**-**L**P**R****X**-**S**D**G**S**D**L**K**L**G**R**E**T**C**L**N**T**A**N**N**S**R**S**K**R**A****Y**F**A**D**R**Q

\*\*

PA2398 **F**A**N**G**W**V**G****I**V**Q**L**D****K**I**N**G**H**A**P**L**G**A**M**C**D**W**D**--**A**P**D**N**S**A**K****V**A**Q****K****C**E**T**K**S**N**L**D**I****Y**L**T**  
PFL\_2391 **D**L**G**D**G**W**V**T**L**Q**L**D**K**I**N**S**H**A**E**L**G**E**G****Q**F**D**E**D**--**Q**T**D**G**T**A**K****N**A**Q****K****Y****C**E**T**T**S**D**S**A**D**L**I****S**  
PFL\_3485 **S**F**A**N**G**W**V**A**A**Q**Y**N**Q**I**N**G**N**A**P**L**G**S**M**S**P**-**N**--**A**E**T**G**I**A**S****L**T**R**K**Y****C**E**T**V**S**D**S****G**D**L**A**T**  
PFL\_4092 **R**F**A**N**S****W**K**M**L**S**A**S**K**S**W**S**D**L**N**L**G**S****P**E**R**--**M**G**A**N**Y**D**E**F**G**Q**N**I**G**R**O**D**Y**E**D**Q**N****S****Y**D**G****Y****T**  
PFL\_2527 **T**C**N**G**W**S**C****V**E**F**T**A**E**N****Q****D**E**L**F**N**F**A**M**G**S**V**--**N**K**D**G**S**G**L**T**Q****P**V**R**F**S****C**T**P**R**O**N**L**D**I****L**T  
PFL\_3315 **C**L**A**N**D**W**T**L**K**V**S**Y**D****L**R**R**Q**H**D**T**L**L**G**S**A**S**G**G**N**D**D**Q**A**S**G**D**G**M**F**Y**M**G****K****K**C**Q**R**O**N**L**D**I**N**H**  
PFL\_2293 **Q**L**N**D**D****W**A**L**K**V**A**G**Y**T**R**R**T**Q**D**I**E**Y****A**F**P**S**G**S**V****V**G**A**S**R**S**T**L**H**G**S**I**Y**D**Y**Q**V**D**Y**G**F**D**A****Y****D**

\*

PA2398 **G**F**F****Q**F**L**G**R**H**H**E**L**V**G**T**S**A**S****F**S**H**----**W**E**C****S**Y**W**N**L**--**R**N**Y**D-**N**T**D**-**D**F**I**N**D**G**D**I**C****P**  
PFL\_2391 **G**F**F**N**L**F**G**R**H**H**E**L**V****G**E**S**A**S****R**-----**W**T**C****N**G**Y**W**S**P**D**F**P**G**G**K**-**G**N**V**V**-**D**F**Y**N**E**G**K**I**E****P**  
PFL\_3485 **G**F**F**D**L**L**G**R**H**H**Q**L**V****G**A**S**I**S****H**----**K**C**D**F**T**S**A**--**T**-**N**H-**N**N**F****Y**-**D**Y**F**N**D**C**H**S**P****K**  
PFL\_4092 **G**F**F**S**L**F**G**R**H**H**E**L**V****G**A**S**R**R**D**L**-----**K**K**G**-----**L**-**P**I**D**L**E**T**H**-**T**N**I**K**P**S**G****L****P****K**  
PFL\_2527 **G**F**F**S**L**F**G**R**H**H**E**L**V**G**G**M**T****E****Y**K**E**R**T**P**S****W**C**W**R**Y**D**A**--**G**-**S**P-**A**G**P**I**D**N**L**F**D****N**G**H**S**P****K**  
PFL\_3315 **G**F**F**S**L**F**G**R**H**H**E**L**V**A**G**F**M****M**A**K**-----**Q**D**I**P**V**H**G**S**V****Y**----**P**-**P**V**G**G-**S**I**Y**D**R**G**E**F**A****K****P**  
PFL\_2293 **G**F**F**Q**A**F**C****O****H**E**L**T**F**C**A**N**A****R****G**I-----**K**D-**D**F**Y**A**V**A**G**L-**P**----**Q**R**Q**-**N**V**L**D**P**D**H**L**P****K****P**

PA2398 **D**W**G**T**P**S**Q**Y-----**I**D**D**K**T****R**O**L**G**S****Y****T**A**R**F**N****T**D**D**L**N**L**F**L**G**G**R**V**D****R**V**T**-**G**L**N**----**P**T  
PFL\_2391 **I**W**G**L**P**A**Q**R-----**T**D**D**T**V**R**C**T**G**T**Y****T**A**R**N**L**M**D**D**L**N**L**F**L**G**R**V**V**N**H**L**T**-**G**L**N**----**P**S  
PFL\_3485 **D**W**G**R**I**T**K**-----**N**D**E**T**T**R**O**S**A****Q****Y****T**A**R**F**S****L**N**D**D**L**S**L**L**G**R**V**N**N****E**V**S**-**G**T**S**----**R**  
PFL\_4092 **D**M**S**A**N**P**W**T-----**Q**R**R**T**S**Q**L**E**G**T**Y****T**R**S****T**D**D**L**K**L**L**L**G**G**R****D**W**N**-**D**Y-**D**V**H**T**T**W**N**G**K**  
PFL\_2527 **S**Q**N**V**S**G**K**A-----**S**I**D**E**N****Q****Y**A**A****T**S**R**S**L**T**D**D**L**S**L**L**G**R**V**I**N****S**S**D**-**S**S**D**R**P**Y**G**--  
PFL\_3315 **D**I**P**K**I**G**D**-----**N**D**I**L**O**R**O**T**C**A**T**A**T**R**K**P**T**D**D**L**A**V**I**G**R**V**S**D**K**G**I**-**D**N**I**R**L**D**P**N  
PFL\_2293 **D**S**Y**E**S**N**S**T**R**G**G**P**T****D**L**R**I**Q****Q****G**L**S****T**V**R**L**K**A**D**P**L**L**V**L**G**R**V**S**W****K**S**Q**N**D**S**V**A**Y**W**R**D**T**

```

PA2398          -----IESGRFYYVGAVYDLNTYSVYSYTIFMPQDSYYRDSSNKYEPDIGQN
PFL_2391      -----YKSGRFYYVGAVYDLDHFSVYSYTIFMPQDSYYRDSSNKYEPDIGQN
PFL_3485      -----TKSTGKVYPYAGVYDLGQNFSVYYSYTIFLPQDDYRDRNDKLKPDRGTM
PFL_4092      ASASSLPNVTRHTRYAGAYDLDQNHSVYSYTIFKPQEL-TSNGAKPLEGKG
PFL_2527      GDETKVKRENGVFPYAGVYDLDTYSVYSYTIFNPQASVRSEDNKPLDPEGKG
PFL_3315      SPDARQRYQTGVTPYAGYDLNSYSYTSIYQPQMS-YVDGKLDPVQDS
PFL_2293      RTPSSARSKETGETPAGVYDLNLNLAYSYSTIFPQQSY-RLDGASLKPLVGS

PA2398          YEGIKGELDGRLNSLAYFEHENRAEDALYNSKPTNAITYAKGIATTKGEA
PFL_2391      YEGIKGELDGRLNSLAYFEHETNRSVPDAYNNQSPTDNYAFKAAVTKGEA
PFL_3485      YEGIKGELDGRLNSLAYFEHENRPVDLAYNANFTDGLDYASKGISALGEA
PFL_4092      YEGIKGELDGRLNSLAYFRIDENRAKVLNPNCNPV-GS-TCYEAGQVRSEGHE
PFL_2527      YEGIKGSFDGRLNSLAYKLQENLAIWQH-----D-NVYSSEQDTTSKGVE
PFL_3315      YEAGIKAELDGRNASFAYHTECHVAQLVDGNGIDA-----IYRPTKGATTKGEA
PFL_2293      YEGIKGELDGRLNSAFSYRTIDQDAQQDD-----PACDSTCSLNSGVRAQGEA

PA2398          EYEGLAPGWQVQAGYTH---KLIDS----GKRVSTWEPQDQSSITSYFKGALDK
PFL_2391      EYEGLSPGWQVQAGYTH---KIVRDDE----GDKISTFEPQDQNYTSYTKGDLDK
PFL_3485      EYEGLAPGWQLQAGYTH---KIIDQS----GAKVSTWEPDQNYTSYLTGSLDK
PFL_4092      EYNCLAPGWELGAGYTYASVKYTDSNEANVGRLFDTDIPRSVFAFTYQLPGDNK
PFL_2527      EFNGLAEGWQASAGYTY---SITDADDQR----ITGVPRNSFRTFTYLQGPLDK
PFL_3315      EYAGLSEGWSLAGYSY---NHTDANHDVYGSVLOSTEPQQVAFSSALPGADR
PFL_2293      EYEGVIERLQVLAGYTYTQTKTEDANSANNGLPPTTYVRRHLLRVWGDQLGAPER

PA2398          LTVGGGARQGKSQMVYNPR-----SRNEXFSQEDYLVDLMAYOITKLSASYNV
PFL_2391      LTVGGGLRQSEQNYSVNAPR-----KINEDISEAYLVDLMTYOITQLSATNV
PFL_3485      LTCSGVRQGTGKISYG-K-----GTEEXFACAPILVDLMAYOITVSALNV
PFL_4092      WTCGGIYQNTIENK-----GTNDYLSTPDYRECKSYALVDLMTSYKASEVNIRLNV
PFL_2527      LTVGGVNQSKIGD-----LHTFQGSYATNLMTYDISRLSASLNG
PFL_3315      LTVGGVNQSQFGKYPDPSDTVNGGHDSITQDGYLVDAMAYOFSQLSSTNV
PFL_2293      FTVCLGVNAQSDNRV---SP-----TSGNHIRQAGLANNGRIGRIDDTWSLALNG

PA2398          NNLDKRYTTINIGF---YTS-ASYGPRNLMFSTRWDF
PFL_2391      NNLDKSYTTNYGF---YNS-AAYGPRNEMLSTRWDF
PFL_3485      NNLDKKYTNIGF---YNS-SYGPRNLSTRNF
PFL_4092      NNLDKRYTQSICTNTDYGLSLGPRNLVTSSL
PFL_2527      NNLDKTYSNAGS---LG---NYGPRNLMSFKSF
PFL_3315      NNLDKKYTTIGIN---SSN-GFYGPRSLQATRWDF
PFL_2293      NNLDKRYTTIGT---EGFGNFYGPRNLLSVADF

```

**Fig. S2. Alignment of PA2398 (FpvAI) from *P. aeruginosa* PAO1 with the six Fpv outer-membrane proteins from Pf-5.** The colored lines above the alignment delineate domains and conserved regions based on the characterized residues of FpvAI: N-terminal signaling domain, blue; connecting loop, purple; TonB box, brown; plug domain, red; and  $\beta$ -strands of the  $\beta$ -barrel, green. Amino acid residues of FpvAI (PA2398) involved in pyoverdine binding are indicated with an asterisk. Residues are highlighted to show levels of similarity: identical residues present in all proteins, black; identical residues present in a subset of proteins, pink; similar residues, green. Locus tags correspond to FpvU (PFL\_2391), FpvV (PFL\_2527), FpvW (PFL\_2293), FpvX (PFL\_3315), FpvY (PFL\_3485), and FpvZ (PFL\_4092).

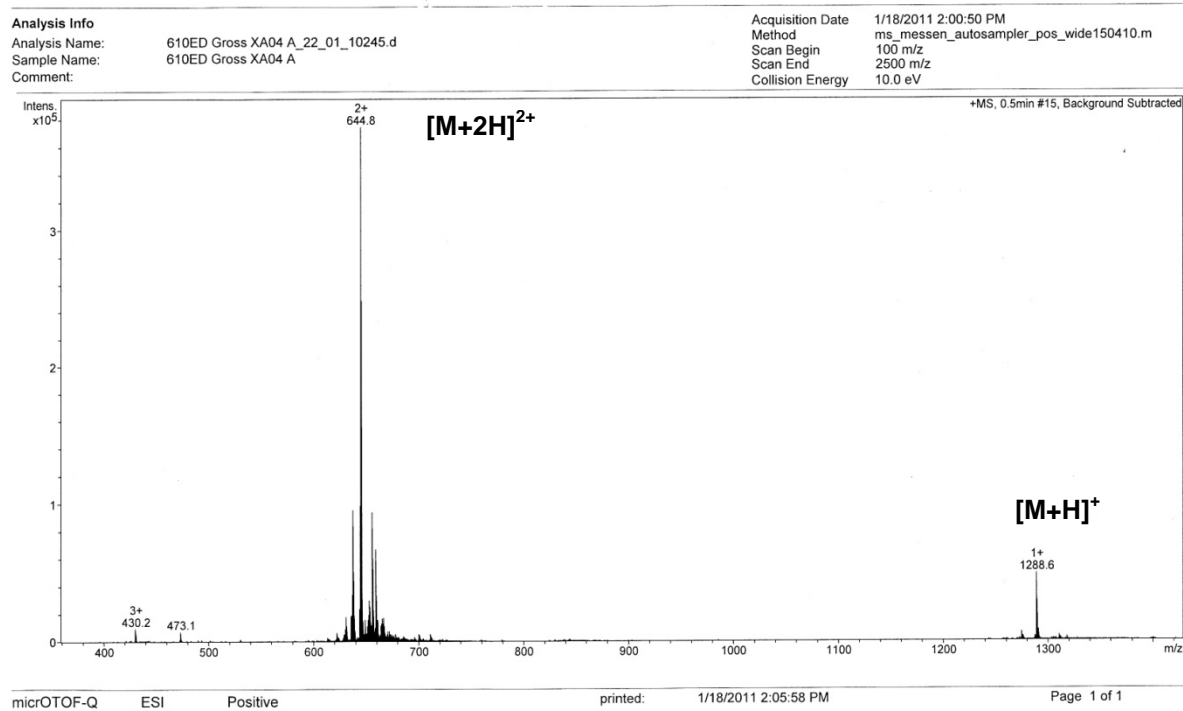

**Fig. S3.** Low-Res-ESI-MS spectrum of the pyoverdine of *P. protegens* Pf-5.

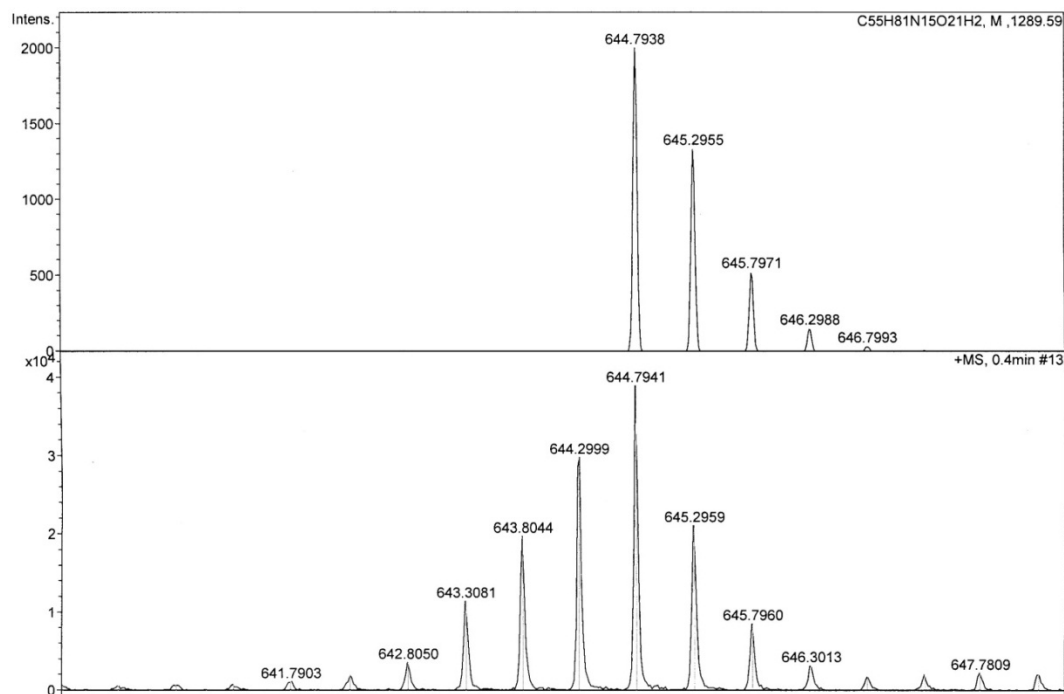

**Fig. S4.** HR-ESI-MS spectrum of the pyoverdine of *P. protegens* Pf-5.

**Text S1. Identification of purified pyoverdines including co-occurring isoforms by high resolution electron spray ionization mass spectroscopy (HR-ESI-MS).** HR-ESI-MS analysis of the pyoverdines of *P. aeruginosa* PAO1 yielded  $[M+H]^+$  ions at  $m/z$  1334.5938 and 1362.5906, which agrees with values obtained in previous studies (5) and the molecular formula of pyoverdine D ( $[M+H]^+$ :  $C_{55}H_{84}N_{17}O_{22}$ ,  $m/z$  1334.5971) and C ( $[M+H]^+$ :  $C_{56}H_{84}N_{17}O_{23}$ ,  $m/z$  1362.5920), respectively (1). The mass difference ( $\Delta$  28 Da) corresponds to the side chains  $\alpha$ -ketoglutaric acid in pyoverdine C and succinic acid in pyoverdine D. Mass analysis of free pyoverdines of *P. fluorescens* B10 gave quasi molecular ions  $[M+H]^+$  at  $m/z$  1035.4381, 1019.4475 and 990.4166. The latter ion is consistent with the formula of pseudobactin ( $[M+H]^+$ :  $C_{42}H_{60}N_{11}O_{17}$ ,  $m/z$  990.4163), which is known to be produced by *P. fluorescens* B10 (7). The occurrence of the other two pyoverdines was reported (5-6) but, to the best of our knowledge, their structures have not been described previously. Empirically, the pyoverdines of one strain differ most likely in the nature of the dicarboxylic acid side chain bound via the amino group of the chromophore or in the chromophore itself. Therefore, we suggest that the derivative with  $M=1018$  Da possibly represents the glutamate isoform of pseudobactin ( $[M+H]^+$ :  $C_{43}H_{63}N_{12}O_{17}$ ,  $m/z$  1019.4429). The remaining derivative with  $M=1034$  shows a difference of 16 Da to B10-1018 which points towards a hydroxylated congener of B10-1018 (e.g. OH-glutamate, 5-OH-chromophore, exchange of Ala with Ser). HR-MS analysis of the pyoverdines of *P. putida* Bn7 revealed three isoforms with  $[M+H]^+$  ions at  $m/z$  1163.4956, 1047.441 and 1134.4751. The structures of these pyoverdines are currently unknown and further structure elucidation was not attempted. However, the mass difference of 29 mass units between Bn7-1133 and Bn7-1162 might be attributable to an exchange of succinic acid with glutamic acid regarding the acyl side chain. In the pyoverdine fractions of *Pseudomonas* sp. SB8.3 and *P. rhodesiae* CFML92-104, isoforms were absent and only one major pyoverdine was detectable. Peaks at  $m/z$  1047.4787 and 1438.6061 confirmed the known pyoverdines of *P. putida* SB83\_(Suc-Chr-Ala-Lys-Thr-Ser-AcOHOrn-cOHOrn;  $[M+H]^+$ :  $C_{45}H_{67}N_{12}O_{17}$ ,  $m/z$  1047.4742)<sup>1</sup> and *P. rhodesiae* CFML92-104 (Mal-Chr-Ser-Lys-FOHOrn-Ser-Ser-Gly-(Lys-FOHOrn-Ser-Ser)<sup>2</sup>;  $C_{58}H_{88}N_{17}O_{26}$ ,  $m/z$  1438.6081), respectively (2, 4).

---

<sup>1</sup> Underline denotes D-configured amino acids. <sup>2</sup> Absolute configuration unknown.



## REFERENCES

1. **Briskot, G., K. Taraz, and H. Budzikiewicz.** 1989. Pyoverdin-type siderophores from *Pseudomonas aeruginosa*. *Liebigs Ann. Chem.* **1989**:375-384.
2. **Budzikiewicz, H.** 2004. Siderophores of the Pseudomonadaceae *sensu stricto* (fluorescent and non-fluorescent *Pseudomonas* spp.). *Fortschr. Chem. Org. Naturst.* **87**:81-237.
3. **Cobessi, D., H. Celia, N. Folschweiller, I. J. Schalk, M. A. Abdallah, and F. Pattus.** 2005. The crystal structure of the pyoverdine outer membrane receptor FpvA from *Pseudomonas aeruginosa* at 3.6 angstrom resolution. *J. Mol. Biol.* **347**:121-134.
4. **Meyer, J. M.** 2007. Siderotyping and bacterial taxonomy: A siderophore bank for a rapid identification at the species level of fluorescent and non-fluorescent *Pseudomonas*, p. 43-65. *In* A. Varma and S. B. Chincholkar (ed.), *Soil Biology: Microbial Siderophores*, vol. 12. Springer-Verlag, Berlin Heidelberg, Germany.
5. **Meyer, J. M., C. Gruffaz, V. Raharinosy, I. Bezverbnaya, M. Schafer, and H. Budzikiewicz.** 2008. Siderotyping of fluorescent *Pseudomonas*: molecular mass determination by mass spectrometry as a powerful pyoverdine siderotyping method. *Biometals* **21**:259-271.
6. **Nowak-Thompson, B., and S. J. Gould.** 1994. A simple assay for fluorescent siderophores produced by *Pseudomonas* species and an efficient isolation of pseudobactin. *Biometals* **7**:20-24.
7. **Teintze, M., M. B. Hossain, C. L. Barnes, J. Leong, and D. van der Helm.** 1981. Structure of ferric pseudobactin, a siderophore from a plant growth promoting *Pseudomonas*. *Biochemistry* **20**:6446-6457.
